# Supplementary material
Source: PubMed Central journal article supplement (PMC7269207)
Supplement: CJN.06480619SupplementaryData.pdf [file CJN.06480619SupplementaryData.pdf]

## Supplemental Material Table of Contents

Supplemental Table 1. Competing risk regression of 1-year overall survival between patients on BIA or control group

Supplemental Table 2. Competing risk regression of 1-year technique survival between patients on BIA or control group

Supplemental Table 3. Competing risk regression of 3-year overall survival between patients on BIA or control group

Supplemental Table 4. Competing regression of 3-year technique survival between patients on BIA or control group

Supplemental Table 5. Clinical characteristics of patients on different outcomes at 1-year follow-up

Supplemental Table 6. Clinical characteristics of patients on different outcomes at 3-year follow-up

Supplemental Table 7. Cox regression analysis of groups associated with all-cause death and technique failure

Supplemental Figure 1. Comparison of the BIA group and the control group in terms of patient survival based on per-protocol population

Supplemental Figure 2. Comparison of the BIA group and the control group in terms of technique survival based on per-protocol population

Supplemental Figure 3. Competing risk analysis on 1-year survival

Supplemental Figure 4. Competing risk analysis on 1-year technique survival

Supplemental Figure 5. Competing risk analysis on 3-year survival

Supplemental Figure 6. Competing risk regression of 3-year technique survival

Supplemental Figure 7. Comparison of the decline rate of the ECW/TBW ratio by 0.001 unit (per month) in the BIA and control group through one year intervention after multiple imputation (a) BIA group; (b) control group

Supplemental Appendix 1

Supplemental Appendix 2

Supplemental Table 1 Competing risk regression of overall survival between the BIA group and control group

|               | Univariable Analysis     |              | Multivariable Analysis   |             |
|---------------|--------------------------|--------------|--------------------------|-------------|
|               | SHR(95% CI)              | <i>p</i>     | SHR(95% CI)              | <i>p</i>    |
| <b>group0</b> | <b>0.24 (0.05, 1.14)</b> | <b>0.074</b> | <b>0.89 (0.12, 6.49)</b> | <b>0.91</b> |
| age           | 1.11 (1.05, 1.18)        | 0            | 1.13 (1.04, 1.24)        | 0.005       |
| Dialysis age  | 1.02 (1.02, 1.03)        | 0            | 1.02 (1.01, 1.04)        | 0.008       |
| DM            | 1.66 (0.47, 5.82)        | 0.43         | 0.71 (0.16, 3.03)        | 0.64        |
| CVD           | 1.21 (0.92, 1.58)        | 0.17         | 1.15 (0.68, 1.95)        | 0.59        |
| SBP           | 0.97 (0.94, 1)           | 0.036        | 0.97 (0.94, 1)           | 0.083       |
| BUA           | 0.78 (0.68, 0.91)        | 0.001        | 0.84 (0.69, 1.03)        | 0.095       |
| ALB           | 1 (0.99, 1.01)           | 0.92         | 1 (0.99, 1.02)           | 0.68        |

Conclusion: The Fine and Gray's proportional subhazards model demonstrated BIA group is not different with the control group either by univariable analysis or multivariable analysis.

Supplemental Table 2 Competing risk regression of 1-year technique survival between the BIA group and control group

|               | Univariable Analysis    |             | Multivariable Analysis   |            |
|---------------|-------------------------|-------------|--------------------------|------------|
|               | SHR(95%CI)              | <i>p</i>    | SHR(95%CI)               | <i>p</i>   |
| <b>group0</b> | <b>0.46 (0.17, 1.2)</b> | <b>0.11</b> | <b>0.44 (0.16, 1.18)</b> | <b>0.1</b> |
| age           | 1 (0.97, 1.03)          | 0.83        | 0.99 (0.97, 1.02)        | 0.67       |
| Dialysis age  | 1 (0.97, 1.02)          | 0.65        | 1 (0.97, 1.02)           | 0.67       |
| DM            | 1.15 (0.44, 3)          | 0.77        | 1.23 (0.48, 3.13)        | 0.66       |
| CVD           | 0.98 (0.7, 1.37)        | 0.91        | 0.93 (0.63, 1.38)        | 0.72       |
| SBP           | 1 (0.98, 1.02)          | 0.93        | 1 (0.98, 1.02)           | 0.81       |
| BUA           | 1.01 (0.9, 1.13)        | 0.91        | 1 (0.89, 1.13)           | 0.96       |
| ALB           | 1 (1, 1.01)             | 0.36        | 1 (1, 1.01)              | 0.32       |

Conclusion: the competing risk analysis demonstrated BIA group is not significantly different with the control group either by univariable analysis or multivariable analysis.

Supplemental Table 3 Competing risk regression of 3-year overall survival the BIA group and control group

| Univariable Analysis |                          |              | Multivariable Analysis |              |
|----------------------|--------------------------|--------------|------------------------|--------------|
|                      | SHR(95%CI)               | <i>p</i>     | SHR(95%CI)             | <i>p</i>     |
| <b>Group</b>         | <b>0.39 (0.20, 0.74)</b> | <b>0.004</b> | <b>0.51(0.26,0.99)</b> | <b>0.047</b> |
| Age                  | 1.06 (1.04, 1.09)        | <0.001       | 1.06(1.03,1.08)        | <0.001       |
| dialysis age         | 1.01 (1.00, 1.02)        | 0.220        | 1.01(1.00,1.02)        | 0.170        |
| DM                   | 2.46 (1.37, 4.43)        | 0.002        | 1.39(0.71,2.69)        | 0.330        |
| CVD                  | 1.20 (0.97, 1.50)        | 0.098        | 1.06(0.77,1.44)        | 0.730        |
| SBP                  | 0.99 (0.97, 1.00)        | 0.130        | 0.98(0.97,1.00)        | 0.030        |
| BUA                  | 0.94 (0.86, 1.02)        | 0.130        | 0.94(0.87,1.02)        | 0.140        |
| ALB                  | 0.99 (0.99, 1.00)        | 0.700        | 1.00(0.99,1.00)        | 0.610        |

Conclusion: The Fine and Gray's proportional subhazards model demonstrated BIA group is on a relatively lower mortality risk than the control group either by univariable analysis or multivariable analysis (adjusted for age, vintage, diabetes, CVD history, hypertension, serum albumin and serum uric acid, SHR and its 95%CI: 0.51 (0.26,0.99), p=0.047.

Supplemental Table 4 Competing risk regression of three-year technique survival between the BIA group and control group

|              | Univariable Analysis     |              | Multivariable Analysis  |              |
|--------------|--------------------------|--------------|-------------------------|--------------|
|              | SHR(95%CI)               | <i>p</i>     | SHR(95%CI)              | <i>p</i>     |
| <b>Group</b> | <b>0.62 (0.35, 1.11)</b> | <b>0.110</b> | <b>0.59(0.32, 1.10)</b> | <b>0.096</b> |
| Age          | 1.00 (0.98, 1.02)        | 0.920        | 1.00(0.98, 1.02)        | 0.910        |
| Dialysis age | 1.00 (0.99, 1.01)        | 0.730        | 1.00(0.99, 1.01)        | 0.810        |
| DM           | 0.99 (0.52, 1.88)        | 0.990        | 1.04(0.53, 2.06)        | 0.910        |
| CVD          | 0.84 (0.60, 1.16)        | 0.280        | 0.80(0.56, 1.13)        | 0.210        |
| SBP          | 0.99 (0.98, 1.01)        | 0.390        | 0.99(0.98, 1.01)        | 0.380        |
| BUA          | 1.01 (0.93, 1.09)        | 0.820        | 1.01(0.93, 1.09)        | 0.800        |
| ALB          | 0.99 (0.99, 1.00)        | 0.900        | 1.00(1.00, 1.00)        | 0.990        |

Conclusions: the difference of technique failure rates was not statistically significant between BIA group and control group. Univariable Analysis showed that the SHR and its %95CI: 0.62 (0.35, 1.11),  $p=0.110$ . And Multivariable Analysis estimated the SHR and its %95CI: 0.59 (0.11, 0.59),  $p=0.096$ .

Supplemental Table 5. Clinical characteristics of patients on different outcomes at 1-year follow-up

| Characteristics                         | Completers<br>(n = 198) | Death<br>(n = 10) | Transfer to HD<br>(n = 17) | Transplant<br>(n = 10) | Dropout<br>(n = 5) | <i>p</i> |
|-----------------------------------------|-------------------------|-------------------|----------------------------|------------------------|--------------------|----------|
| <b>Age (yr)</b>                         | 49.53 ± 15.10           | 67.8 ± 9.6**      | 48.4 ± 16.3                | 36.1 ± 9.4**           | 45.0 ± 16.4        | <0.001   |
| <b>Vintage (month)</b>                  | 31 (14, 50)             | 41 (31, 57) **    | 29 (19, 54)                | 30(16, 37)             | 36 (24, 60)        | 0.01     |
| <b>Diabetes mellitus</b>                | 59 (29.8)               | 4 (40.0)          | 5 (29.4)                   | 0 ( 0.0)               | 1 (20.0)           | 0.29     |
| <b>Systolic BP (mmHg)</b>               | 142 ± 20                | 130 ± 18          | 142 ± 17                   | 138 ± 25               | 149 ± 19           | 0.36     |
| <b>Diastolic BP (mmHg)</b>              | 84 ± 13                 | 77 ± 11           | 80 ± 14                    | 90 ± 11                | 89 ± 19            | 0.15     |
| <b>History of CVD n, (%)</b>            | 24 (12.1)               | 4 (40.0) *        | 3 (17.6)                   | 1 (10.0)               | 1 (20.0)           | 0.14     |
| <b>History of stroke n, (%)</b>         | 8 ( 4.0)                | 1 (10.0)          | 1 ( 5.9)                   | 0 ( 0.0)               | 0 ( 0.0)           | 0.80     |
| <b>Comorbidity score</b>                | 3 (2,5)                 | 5 (2, 6) **       | 3 (2, 4)                   | 2 (1, 3) **            | 3 (1,4)            | 0.001    |
| <b>ECOG activity index (1/2/3/4) n</b>  | 3/115/69/11             | 0/1/6/3**         | 0/10/4/3                   | 0/9/1/0*               | 0/3/1/1            | 0.02     |
| <b>NYHA classification (1/2/3) n</b>    | 90/95/13                | 1/7/2*            | 3/12/2                     | 8/2/0                  | 2/1/2*             | 0.003    |
| <b>mGFR (ml/min/1.73 m<sup>2</sup>)</b> | 0.9 (0.2, 2.7)          | 0.6 (0, 0.8)      | 0.5 (0, 2.8)               | 0.1 (0.1, 0.2) *       | 1.3 (1.0, 2.5)     | 0.05     |
| <b>Hemoglobin (g/dL)</b>                | 10.8 ± 1.7              | 11.9 ± 1.9        | 9.6 ± 2.3*                 | 11.4 ± 2.5             | 10.0 ± 3.7         | 0.02     |
| <b>Serum albumin(g/dL)</b>              | 3.7 ± 0.4               | 3.4 ± 0.4**       | 3.7 ± 0.3                  | 3.8 ± 0.3              | 3.7 ± 0.5          | 0.04     |
| <b>Pre-albumin (mg/dl)</b>              | 372 ± 90                | 299 ± 60**        | 390 ± 67                   | 408 ± 72               | 392 ± 94           | 0.05     |
| <b>Uric acid (mg/dl)</b>                | 4.5 ± 0.8               | 4.5 ± 1.4         | 4.8 ± 1.1                  | 4.9 ± 0.7              | 4.3 ± 0.7          | 0.48     |
| <b>iPTH (pg/ml)</b>                     | 409 (248, 681)          | 411 (231, 814)    | 422 (260, 730)             | 602 (288, 781)         | 313 (274, 609)     | 0.92     |
| <b>hs-CRP (mg/L)</b>                    | 1.5 (0.6, 4.4)          | 4.2 (2.7, 10.6) * | 1.3 (0.5, 9.4)             | 0.7(0.3, 1.9)          | 1.4 (0.9, 2.5)     | 0.18     |
| <b>NT-proBNP (pg/ml)</b>                | 4106                    | 48981             | 11664                      | 3257                   | 7865               | 0.16     |

|                                                      |                     |                      |                      |                      |                      |       |
|------------------------------------------------------|---------------------|----------------------|----------------------|----------------------|----------------------|-------|
|                                                      | (1603, 12199)       | (11154, 90970)       | (3159, 28962)        | (2000, 12255)        | (1691, 17377)        |       |
| <b>PD dosage (L/d)</b>                               | 8 (8, 8)            | 8 (8, 8)             | 8 (8, 10)            | 8 (8,9)              | 8 (8,8)              | 0.25  |
| <b>Total Kt/v</b>                                    | 2.3 ± 0.6           | 1.8 ± 0.3*           | 1.9 ± 0.6*           | 2.2 ± 0.5            | 2.2 ± 0.2            | 0.05  |
| <b>Total Ccr (L/w)</b>                               | 67 ± 23             | 49 ± 15              | 59 ± 18              | 58 ± 15              | 76 ± 14              | 0.11  |
| <b>nPCR</b>                                          | 0.8 ± 0.2           | 0.7 ± 0.2*           | 0.7 ± 0.1*           | 0.9 ± 0.2            | 0.8 ± 0.1            | 0.02  |
| <b>Total body water (L)</b>                          | 37.0 ± 7.1          | 36.1 ± 4.8           | 43.8 ± 10.7**        | 35.6 ± 10.8          | 39.2 ± 7.7           | 0.009 |
| <b>Extracellular water (L)</b>                       | 15.2 ± 3.1          | 14.9 ± 2.1           | 18.1 ± 4.4**         | 14.4 ± 4.5           | 16.5 ± 4.1           | 0.01  |
| <b>Intracellular water (L)</b>                       | 21.8 ± 4.4          | 21.2 ± 2.8           | 25.6 ± 6.2**         | 21.2 ± 6.3           | 23.1 ± 4.3           | 0.02  |
| <b>Extracellular wate//total body water (× 10e2)</b> | 40.5<br>(40.0,41.2) | 40.6<br>(40.2, 41.0) | 40.8<br>(40.2, 41.5) | 40.2<br>(40.0, 40.8) | 40.6<br>(40.2, 40.9) | 0.88  |

Note: values for continuous variables are given as mean ± standard deviation or median [interquartile range] . Post hoc multiple comparisons were conducted between “death, transfer to HD, transplant and dropout” and “completers” respectively. \*p < 0.05; \*\*p < 0.01

Abbreviations: BP, blood pressure; CVD, cardiovascular disease; NYHA, New York Heart association 1 as grade I, 2 as grade II, 3 as grade III; mGFR, measured glomerular filtration rate; iPTH, intact parathyroid hormone; hs-CRP, high-sensitivity C-reactive protein; NT-proBNP, N-terminal pro-natriuretic peptide; PD, peritoneal dialysis; Ccr, creatinine clearance; nPCR, normalized protein clearance rate.

Supplemental Table 6. Clinical characteristics of patients on different outcomes at 3-year follow-up

| Characteristics                         | Completers<br>(n = 86) | Death<br>(n = 44) | Transfer to HD<br>(n = 46) | Transplant<br>(n = 42) | Dropout<br>(n = 22) | <i>p</i> |
|-----------------------------------------|------------------------|-------------------|----------------------------|------------------------|---------------------|----------|
| <b>Age (yr)</b>                         | 50.1 ± 14.2            | 60.8 ± 13.9 **    | 49.3 ± 14.7                | 36.1 ± 10.1 **         | 50.5 ± 14.2         | < 0.001  |
| <b>Vintage (month)</b>                  | 32 (16, 46)            | 25 (18, 45)       | 31 (17, 50)                | 30 (16, 40)            | 33 (6,41)           | 0.85     |
| <b>Diabetes mellitus</b>                | 25 (29.1)              | 21(47.7)          | 13(28.3)                   | 2(4.8) **              | 8(36.4)             | < 0.001  |
| <b>Systolic BP (mmHg)</b>               | 143 ± 21               | 137 ± 21          | 140 ± 17                   | 139 ± 18               | 156 ± 19 *          | 0.007    |
| <b>Diastolic BP (mmHg)</b>              | 83 ± 12                | 77 ± 11 **        | 82 ± 14                    | 90 ± 10 **             | 88 ± 15             | < 0.001  |
| <b>History of CVD n, (%)</b>            | 7 (8.1)                | 12 (27.3) **      | 6 (13)                     | 3 (7.1)                | 5 (22.7)            | 0.02     |
| <b>History of stroke n, (%)</b>         | 3 (3.5)                | 2 (4.5)           | 2 (4.3)                    | 1 (2.4)                | 2 (9.1)             | 0.41     |
| <b>Comorbidity score</b>                | 3(2,5)                 | 6 (3,7) **        | 3(2,6)                     | 2 (2,3) **             | 3(2,6)              | < 0.001  |
| <b>ECOG activity index (1/2/3/4) n</b>  | 2/51/30/3              | 1/12/23/8**       | 0/29/13/4                  | 0/36/6/0*              | 0/10/9/3            | < 0.001  |
| <b>NYHA classification (1/2/3) n</b>    | 41/40/5                | 11/25/5*          | 18/26/2                    | 28/12/2                | 6/11/5*             | 0.001    |
| <b>mGFR (ml/min/1.73 m<sup>2</sup>)</b> | 1.1 (0.2, 3.6)         | 1.0 (0.9, 1.6)    | 0.5 (0, 2.8)               | 0.2 (0, 1.1) **        | 0.7 (0.1, 2.9)      | 0.08     |
| <b>Hemoglobin (g/dL)</b>                | 10.8 ± 1 .8            | 11.1 ± 1 .6       | 10.8 ± 2 .2                | 10.7 ± 1 .8            | 9.8 ± 2 .3*         | 0.15     |
| <b>Serum albumin(g/dL)</b>              | 3.7 ± 0.4              | 3.6 ± 0.4         | 3.7 ± 0.4                  | 3.8 ± 0.2              | 3.7 ± 0.4           | 0.62     |
| <b>Pre-albumin (mg/dl)</b>              | 368 ± 96               | 324 ± 89          | 388 ± 68                   | 411 ± 74 **            | 383 ± 73            | < 0.001  |
| <b>Uric acid (mg/dl)</b>                | 4.6 ± 1.0              | 4.5 ± 1.0         | 4.5 ± 0.8                  | 4.6 ± 0.7              | 4.4 ± 1.1           | 0.93     |
| <b>iPTH (pg/ml)</b>                     | 421<br>(234, 701)      | 459<br>(281, 588) | 387<br>(224, 690)          | 478<br>(288, 842)      | 386<br>(248, 502)   | 0.30     |
| <b>hs-CRP (mg/L)</b>                    | 1.5 (0.2, 4.4)         | 2.7 (1.2, 7.8)    | 1.8 (0.5, 6.2)             | 0.8 (0.2, 1.8)         | 2.6 (0.8, 10.3)     | 0.006    |



|                                                          |                       |                        |                        |                        |                        |       |
|----------------------------------------------------------|-----------------------|------------------------|------------------------|------------------------|------------------------|-------|
| <b>NT-proBNP (pg/ml)</b>                                 | 4147<br>(2106, 14188) | 2993<br>(1986, 9019)   | 4066<br>(1419, 13145)  | 4788<br>(1980, 14556)  | 12317<br>(3620, 23102) | 0.34  |
| <b>PD dosage (L/d)</b>                                   | 8 (8,8)               | 8 (8,8)                | 8 (8,8) *              | 8 (7,8)                | 8 (8,8)                | 0.72  |
| <b>Total Kt/v</b>                                        | 2.3 ± 0.6             | 2.2 ± 0.7              | 2.1 ± 0.6 *            | 2.2 ± 0.5              | 2.2 ± 0.3              | 0.15  |
| <b>Total Ccr (L/w)</b>                                   | 71 ± 25               | 63 ± 24                | 61 ± 17                | 62 ± 23                | 64 ± 15                | 0.14  |
| <b>nPCR</b>                                              | 0.9 ± 0.1             | 0.8 ± 0.2              | 0.8 ± 0.1              | 0.8 ± 0.1              | 0.8 ± 0.2              | 0.26  |
| <b>Total body water (L)</b>                              | 37.1 ± 7.3            | 35.4 ± 7.1             | 40.0 ± 8.8 *           | 36.8 ± 7.7             | 38.6 ± 5.9             | 0.05  |
| <b>Extracellular water (L)</b>                           | 15.1 ± 3.2            | 14.8 ± 2.4             | 16.5 ± 4.0 *           | 15.0 ± 3.4             | 16.1 ± 3.0             | 0.08  |
| <b>Intracellular water (L)</b>                           | 21.9 ± 4.3            | 21.1 ± 3.5             | 23.1 ± 6.3             | 21.8 ± 4.7             | 22.7 ± 3.4             | 0.31  |
| <b>Extracellular water//total<br/>body water (×10e2)</b> | 40.4<br>(40.1,41.1)   | 41.0 **<br>(40.4,41.9) | 41.0**<br>(40.4, 41.8) | 40.3<br>(40.1, 40.9) * | 40.7*<br>(40.3, 41.2)  | 0.008 |

Note: values for continuous variables are given as mean ± standard deviation or median [interquartile range] . Post hoc multiple comparisons were conducted between “death, transfer to HD, transplant and drop-out” and “completers” respectively. \*p < 0.05; \*\*p < 0.01

Abbreviations: BP, blood pressure; CVD, cardiovascular disease; NYHA, New York Heart association 1 as grade I, 2 as grade II, 3 as grade III; mGFR, measured glomerular filtration rate; iPTH, intact parathyroid hormone; hs-CRP, high-sensitivity C-reactive protein; NT-proBNP, N-terminal pro-natriuretic peptide; PD, peritoneal dialysis; Ccr, creatinine clearance; nPCR, normalized protein clearance rat.



Supplemental Table 7 Cox regression analysis of groups associated with all-cause death and technique failure

| Factors                   | All-cause death   |          |                  |          | Technique failure |          |                  |          |
|---------------------------|-------------------|----------|------------------|----------|-------------------|----------|------------------|----------|
|                           | Univariable       |          | multivariable    |          | univariable       |          | multivariable    |          |
|                           | HR (95%CI)        | <i>p</i> | HR (95%CI)       | <i>p</i> | HR (95%CI)        | <i>p</i> | HR (95%CI)       | <i>p</i> |
| At 1 year                 |                   |          |                  |          |                   |          |                  |          |
| Group (BIA vs. control)*  | 2.71(0.72, 10.24) | 0.14     | 2.27(0.59, 8.68) | 0.23     | 1.95(0.94, 4.04)  | 0.07     | 1.73(0.83, 3.62) | 0.14     |
| At 3 years                |                   |          |                  |          |                   |          |                  |          |
| Group (BIA vs. control)** | 0.37(0.19, 0.72)  | 0.003    | 0.39(0.20, 0.76) | 0.006    | 1.08(0.60, 1.93)  | 0.78     | 1.06(0.58, 1.91) | 0.84     |

Abbreviation: BIA, bioimpedance analysis; CVD, cardiovascular disease; SBP, systolic blood pressure

\* Adjusted by NYHA classification

\*\* Adjusted by systolic BP, NYHA classification, hemoglobin (g/L), and ECW/TBW ratio

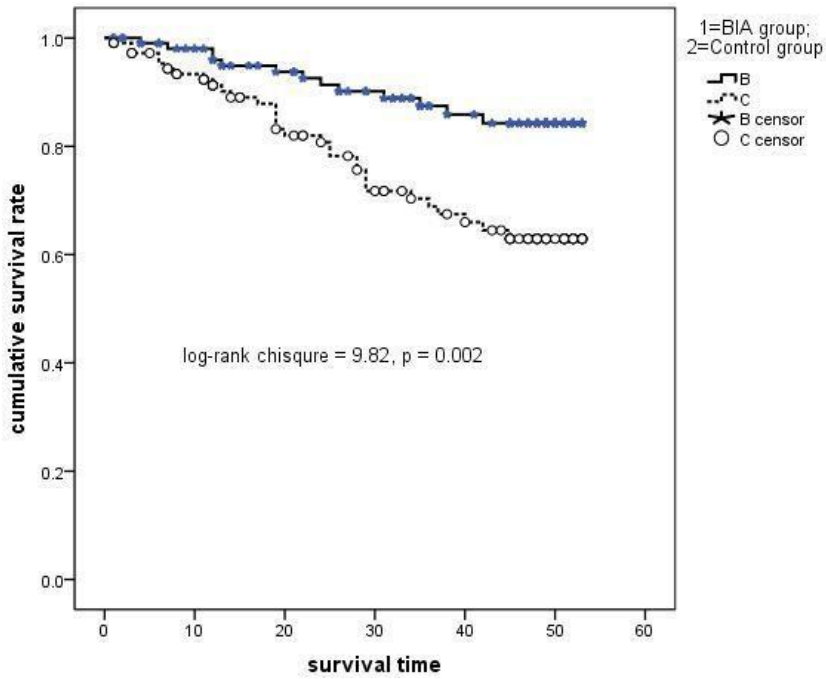

Number at risk

|               |     |     |    |    |    |    |
|---------------|-----|-----|----|----|----|----|
| BIA group     | 120 | 110 | 89 | 76 | 60 | 25 |
| Control group | 120 | 110 | 77 | 62 | 52 | 21 |

Supplemental Figure 1 Kaplan Meier curve of comparison of the BIA group and the control group in terms of patient survival based on per-protocol population (excluded: poor adherence to treatment regimen = 22; main indicator missing at baseline = 0; taking prohibited drugs = 0)

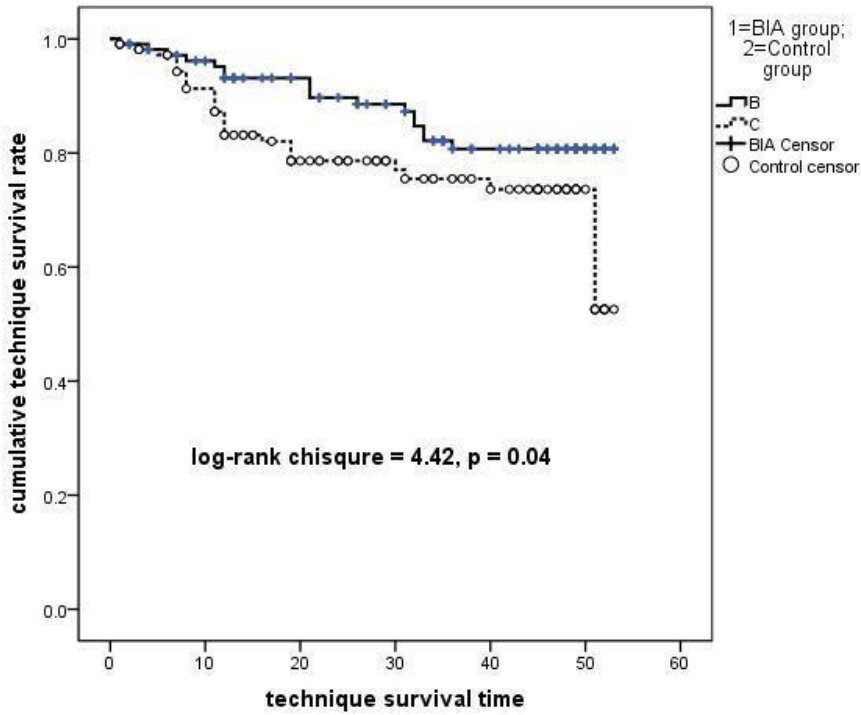

Number at risk

|               |     |     |    |    |    |    |
|---------------|-----|-----|----|----|----|----|
| BIA group     | 120 | 104 | 89 | 76 | 60 | 25 |
| Control group | 120 | 98  | 72 | 62 | 47 | 16 |

Supplemental Figure 2 Kaplan Meier curve of comparison of the BIA group and the control group in terms of technique survival based on per-protocol population (excluded: poor adherence to treatment regimen = 22; main indicator missing at baseline = 0; taking prohibited drugs = 0)

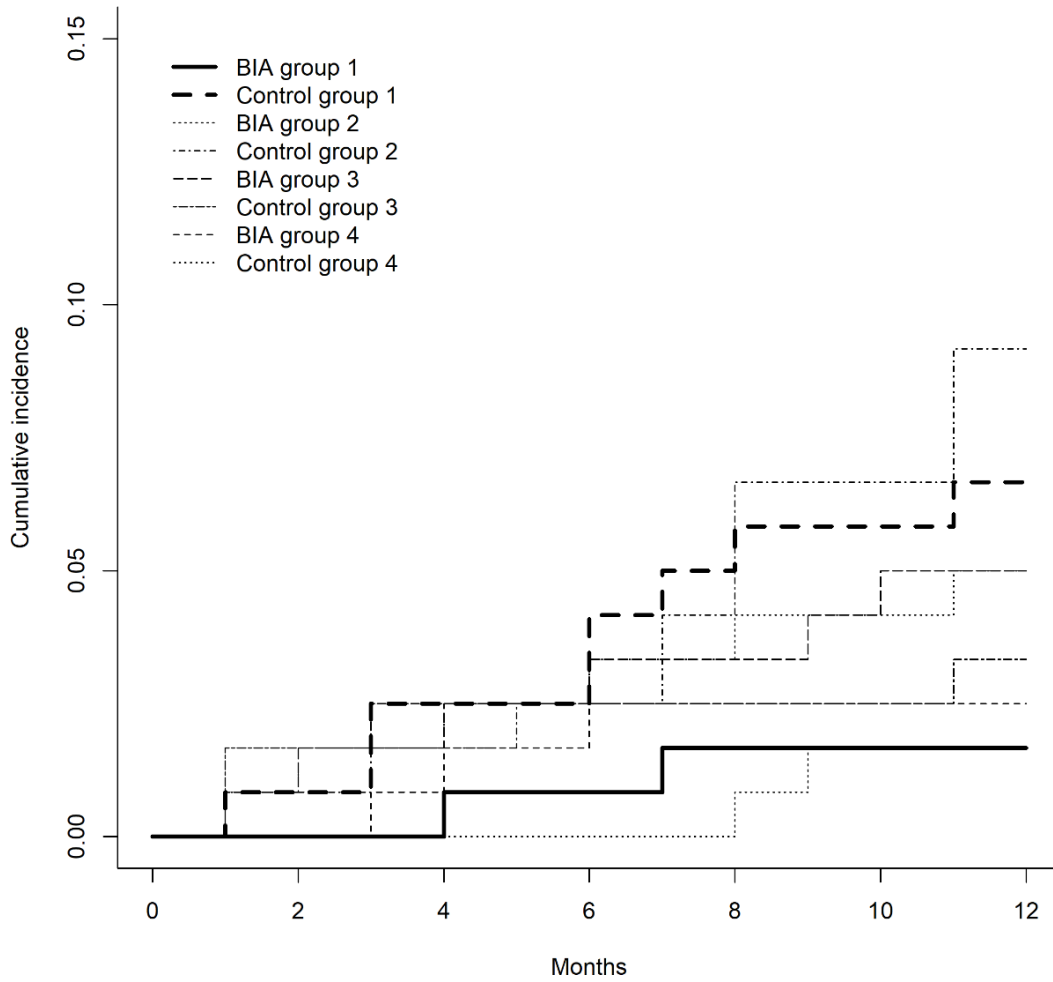

Supplemental Figure 3 Competing risk analysis on 1-year survival  
 Cumulative incidence plot of the event and competing events, in which 1 = transfer to HD (technique failure), 2 = death, 3 = transplantation, 4 = withdraw due to poor adherence.

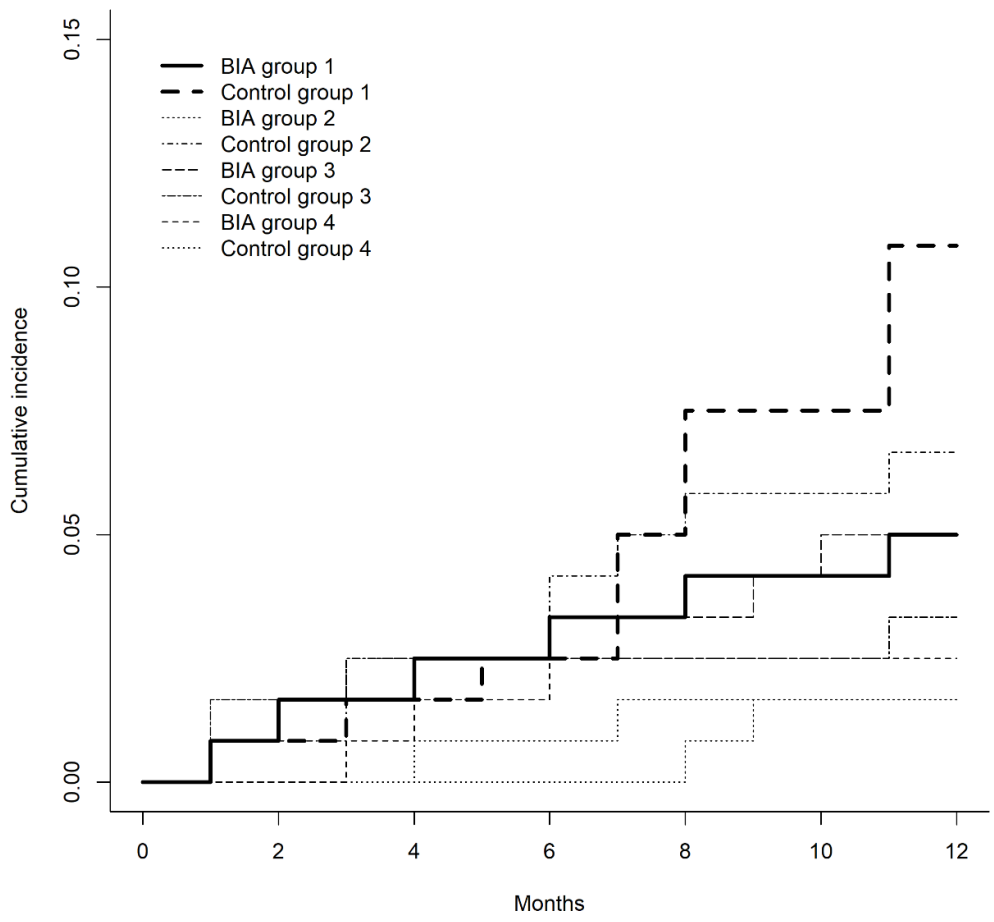

Supplemental Figure 4 Competing risk analysis on 1-year technique survival  
 Competing events recorded as censor in the database are “0 = complete trial, 1 = transfer to HD (technique failure), 2 = death, 3 = transplantation, 4 = withdraw due to poor adherence”.

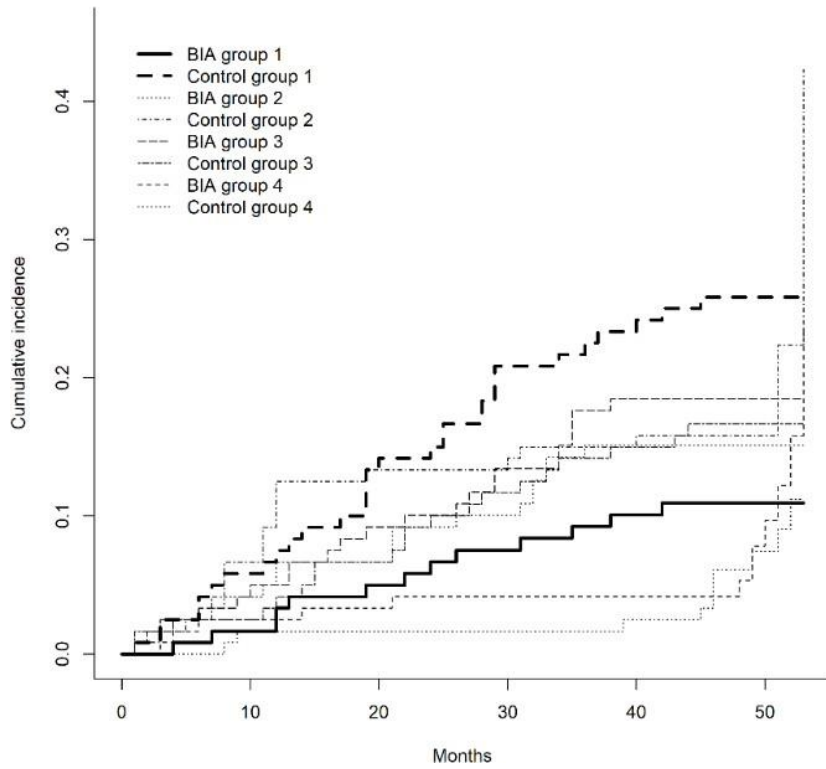

Supplemental Figure 5 Competing risk analysis on 3-year survival  
 Cumulative incidence plot of the event and competing events, in which 1 = transfer to HD (technique



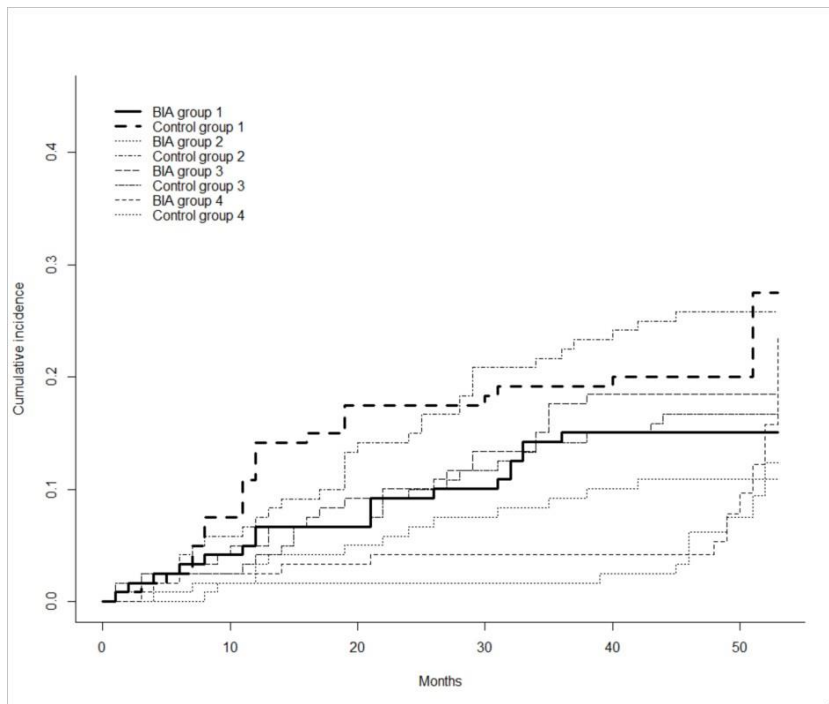

Supplemental Figure 6 Competing risk regression of 3-year technique survival  
 Competing events recorded as censor in the database are “0 = complete trial, 1 = transfer to HD (technique failure), 2 = death, 3 = transplantation, 4 = withdraw due to poor adherence”.

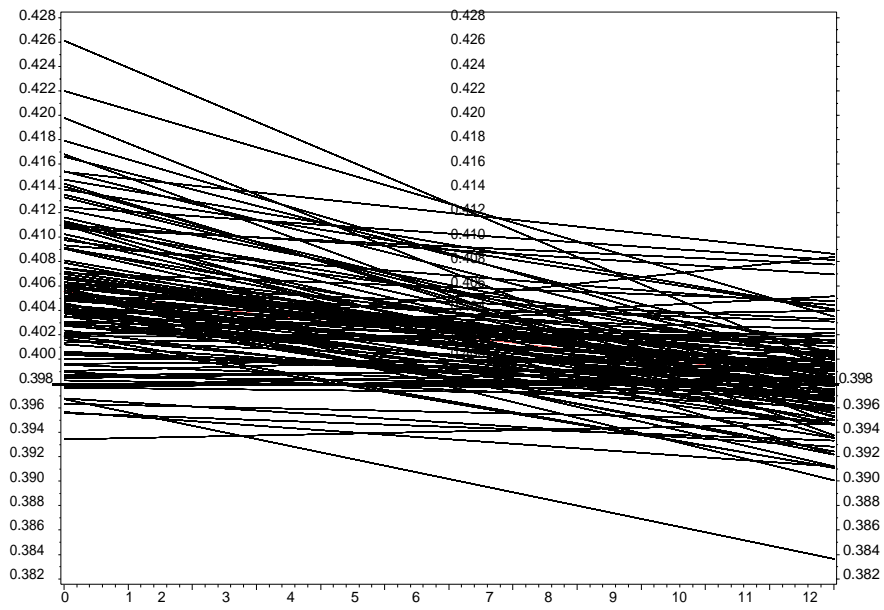

(a)

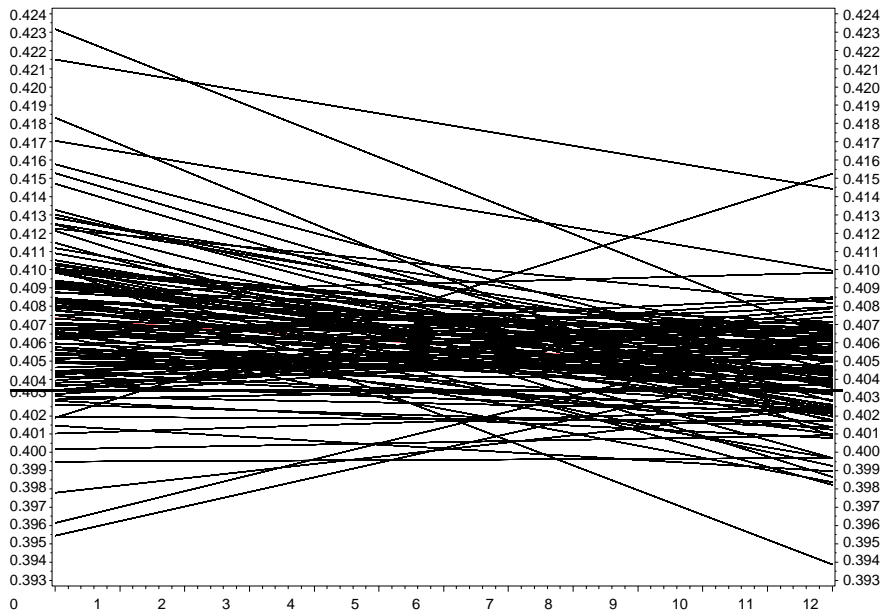

(b)

Figure 7 Comparison of the decline rate of the ECW/TBW ratio by 0.001 unit (per month) in the BIA and control group through one year intervention after multiple imputation (a) BIA group; (b) control group.

## Supplemental Appendix 1

The sample size estimation was based on Log Rank Test Power Analysis of Numeric Results in Terms of Sample Size when the Test was Two-Sided using PASS software 11.0. The per-group sample size required for BIA-guided fluid management to show a significant increase (10%) in one year in patient survival (power of 90%,  $\alpha$  error of 0.05) was calculated using a significance test. Surviving rates in BIA group and control group were set as 85% [17,18] and 95% [19-21], separately. The necessary sample size was 108 for each group as per the equal-sample-size bunch design. Allowing for a 10% drop out rate, the total sample size required was 240. The trial was extended to 3 years follow-up based on 1-year analysis for the following reasons: first, we found there were differences in both patient survival (96% and 90%) and technique survival (95% and 89%) during 1-year follow-up time (Fig 2-a, b, c), although no significant statistical difference was found; second, 1-year patient survival rate of BIA group and control group were 96% and 90% respectively, which was higher than the patient survival we used to calculate sample size with 1-year observation time (95% and 85%). Therefore, the number of events for the primary endpoint (death) by the end of one year was 11 which was much less than we assumed at initial design (24 cases). Therefore, we extended to 3-year follow up in order to get more events to show the difference of long-term survival.

## Supplemental Appendix 2

The primary outcome for the survival analysis was a recorded event of “patient death” coded as 1. Competing events included kidney transplantation coded as 2, transfer to HD as 3, loss to follow-up as 4. Those who completed the trial and did not die by the end of follow up was censored. To evaluate the association of intervention group and transfer to HD (i.e. technique failure), competing events in the model were defined as “death coded as 2, transplantation as 3, and withdraw due to poor adherence as 4”. Those who completed the trial and did not die by the end of follow up was censored. Analysis was performed by the package of cmprskin R software.
